# Supplementary material
Source: PubMed Central journal article supplement (PMC6363907)
Supplement: NIHMS1503031-supplement-10822_2018_143_MOESM1_ESM.pdf [file NIHMS1503031-supplement-10822_2018_143_MOESM1_ESM.pdf]

Supplementary Material for “Alchemical Grid  
Dock (AlGDock) calculations in the D3R Grand  
Challenge 3: Binding Free Energies between  
Flexible Ligands and Rigid Receptors”

Bing Xie      David D. L. Minh\*

July 30, 2018

# 1 Supplementary Methods

## 1.1 Homologous Structures

The following structures were identified as having greater than 90% sequence homology to the template sequences and were downloaded from the Protein Data Bank.

*Cathepsin S*: 1GLO, 1MS6, 1NPZ, 1NQC, 2C0Y, 2F1G, 2FQ9, 2FRA, 2FRQ, 2FT2, 2FUD, 2FYE, 2G6D, 2G7Y, 2H7J, 2HH5, 2HHN, 2HXZ, 2OP3, 2R9M, 2R9N, 2R9O, 3IEJ, 3KWN, 3MPE, 3MPF, 3N3G, 3N4C, 3OVX.

*VEGFR2*: 1VR2, 1Y6A, 1Y6B, 1YWN, 2OH4, 2P2H, 2P2I, 2QU5, 2QU6, 2RL5, 2XIR, 3B8Q, 3B8R, 3BE2, 3C7Q, 3CJF, 3CJG, 3CP9, 3CPB, 3CPC, 3DTW, 3EFL, 3EWH, 3U6J, 3VHE, 3VHK, 3VID, 3VNT, 3VO3, 4AG8, 4AGC, 4AGD, 4ASD, 4ASE.

*JAK2*: 2B7A, 2W1I, 2XA4, 3E62, 3E63, 3E64, 3FUP, 3IO7, 3IOK, 3JY9, 3KCK, 3KRR, 3LPB, 3Q32, 3RVG, 3TJC, 3TJD, 3UGZ, 3ZMM, 4AQC, 4BBE, 4BBF, 4E4M, 4E6D, 4E6Q, 4F08, 4F09, 4GFM, 4GL9, 4GMY, 4HGE, 4IVA, 4JI9, 4JIA.

*p38- $\alpha$* : 1A9U, 1BL6, 1BL7, 1BMK, 1DI9, 1IAN, 1KV1, 1KV2, 1LEW, 1LEZ, 1M7Q, 1OUK, 1OUY, 1OVE, 1OZ1, 1P38, 1R39, 1R3C, 1W7H, 1W82, 1W83, 1W84, 1WBN, 1WBO, 1WBS, 1WBT, 1WBV, 1WBW, 1WFC, 1YQJ, 1YW2, 1YWR, 1ZYJ, 1ZZ2, 1ZZL, 2BAJ, 2BAK, 2BAL, 2BAQ, 2EWA, 2FSL, 2FSM, 2FSO, 2FST, 2GFS, 2GHL, 2GHM, 2GTM, 2GTN, 2I0H, 2LGC, 2NPQ, 2OKR, 2ONL, 2OZA, 2PUU, 2QD9, 2RG5, 2RG6, 2Y8O, 2YIS, 2YIW, 2YIX, 2ZAZ, 2ZB0, 2ZB1, 3BV2, 3BV3, 3BX5, 3C5U, 3CTQ, 3D7Z, 3D83, 3DS6, 3DT1, 3E92, 3E93, 3FC1, 3FI4, 3FKL, 3FKN, 3FKO, 3FL4, 3FLN, 3FLQ, 3FLS, 3FLW, 3FLY, 3FLZ, 3FMH, 3FMJ, 3FMK, 3FML, 3FMM, 3FMN, 3FSF, 3FSK, 3GC7, 3GCP, 3GCQ, 3GCS, 3GCU, 3GCV, 3GFE, 3GI3, 3HA8, 3HEC, 3HEG, 3HL7, 3HLL, 3HP2, 3HP5, 3HRB, 3HUB, 3HUC, 3HV3, 3HV4, 3HV5, 3HV6, 3HV7, 3HVC, 3IPH, 3ITZ, 3IW5, 3IW6, 3IW7, 3IW8, 3K3I, 3K3J, 3KF7, 3KQ7, 3L8S, 3L8X, 3LFA, 3LFB, 3LFC, 3LFD, 3LFE, 3LFF, 3LHJ, 3MGY, 3MH0, 3MH1, 3MH2, 3MH3, 3MPA, 3MPT, 3MVL, 3MVM, 3MW1, 3NEW, 3NNU, 3NNV, 3NNW, 3NNX, 3NWW, 3O8P, 3O8T, 3O8U, 3OBG, 3OBJ, 3OC1, 3OCG, 3OD6, 3ODY, 3ODZ, 3OEF, 3P4K, 3P5K, 3P78, 3P79, 3P7A, 3P7B, 3P7C, 3PG3, 3PY3, 3QUD, 3QUE, 3RIN, 3ROC, 3S3I, 3S4Q, 3TG1, 3U8W, 3UVP, 3UVQ, 3UVR, 3ZS5, 3ZSG, 3ZSH, 3ZSI, 3ZYA, 4A9Y, 4AA0, 4AA4, 4AA5, 4AAC, 4DLI, 4DLJ, 4E5A, 4E5B, 4E6A, 4E6C, 4E8A, 4EH2, 4EH3, 4EH4, 4EH5, 4EH6, 4EH7, 4EH8, 4EH9, 4EHV, 4EWQ, 4F9W, 4F9Y, 4FA2, 4GEO, 4KA3, 4KIN, 4KIP, 4KIQ, 4LOO, 4LOP, 4LOQ.

## 1.2 Binding Site Residues

The following residues in the template structure were identified as being in the binding site of each receptor.

*Cathepsin S*: 23 25 26 67 68 69 70 71 161 162 163 164 165

*VEGFR2*: 840 848 865 866 867 868 869 885 898 899 900 914 915 916 917 918 919 922 923 924 1031 1032 1033 1034 1035 1036 1044 1046

*JAK2*: 858 859 860 867 869 884 933 935 936 937 939 940 984 987 997 998

*p38- $\alpha$* : 40 41 42 43 59 60 61 62 63 64 75 80 83 92 93 94 95 108 109 110 111 112 113 224 225 226 227 228 229 230 231 232 233 234 235 236 237 238 239 240 241 242 243 244 245

## 1.3 Molecular Docking Parameters

|                        |      |
|------------------------|------|
| grid_spacing           | 0.25 |
| energy_cutoff_distance | 9999 |
| attractive_exponent    | 6    |
| repulsive_exponent     | 12   |
| distance_dielectric    | yes  |
| dielectric_factor      | 4    |
| bump_filter            | yes  |
| bump_overlap           | 0.75 |

Table 1: Parameters for showbox

|                                |      |
|--------------------------------|------|
| max_orientations               | 5000 |
| flexible_ligand                | yes  |
| min_anchor_size                | 40   |
| pruning_max_orients            | 1000 |
| pruning_clustering_cutoff      | 1000 |
| pruning_conformer_score_cutoff | 25.0 |
| max_bumps_anchor               | 12   |
| max_bumps_growth               | 12   |
| num_scored_conformers          | 1000 |
| cluster_conformations          | yes  |
| cluster_rmsd_threshold         | 2.0  |

Table 2: Parameters for UCSF DOCK 6
